# Supplementary material
Source: publisher figshare collection journal article supplement (https://acs.figshare.com/ndownloader/files/12821912)
Supplement: Supplementary file 1 [file 12821912]

# High Current Density and Low Hysteresis Effect of Planar Perovskite Solar Cells via PCBM-doping and Interfacial Improvement

*He Jiang,<sup>†,‡</sup> Gelei Jiang,<sup>†,‡</sup> Weiwei Xing,<sup>†,‡</sup> Weiming Xiong,<sup>†,‡</sup> Xiaoyue Zhang,<sup>†,‡</sup> Biao Wang,<sup>\*,†,§</sup> Huiyan Zhang<sup>†,‡</sup> and Yue Zheng<sup>\*,†,‡</sup>*

<sup>†</sup>State Key Laboratory of Optoelectronic Materials and Technologies, School of Physics and <sup>‡</sup>Micro and Nano Physics and Mechanics Research Laboratory, School of Physics, Sun Yat-sen University, Guangzhou 510275, China.

<sup>§</sup>Sino-French Institute of Nuclear Engineering and Technology, Sun Yat-sen University, Zhuhai, 519082, China.

\*Correspondence and requests for materials should be addressed to Y. Z. (email: zhengy35@mail.sysu.edu.cn) or B. W. (email: wangbiao@mail.sysu.edu.cn).

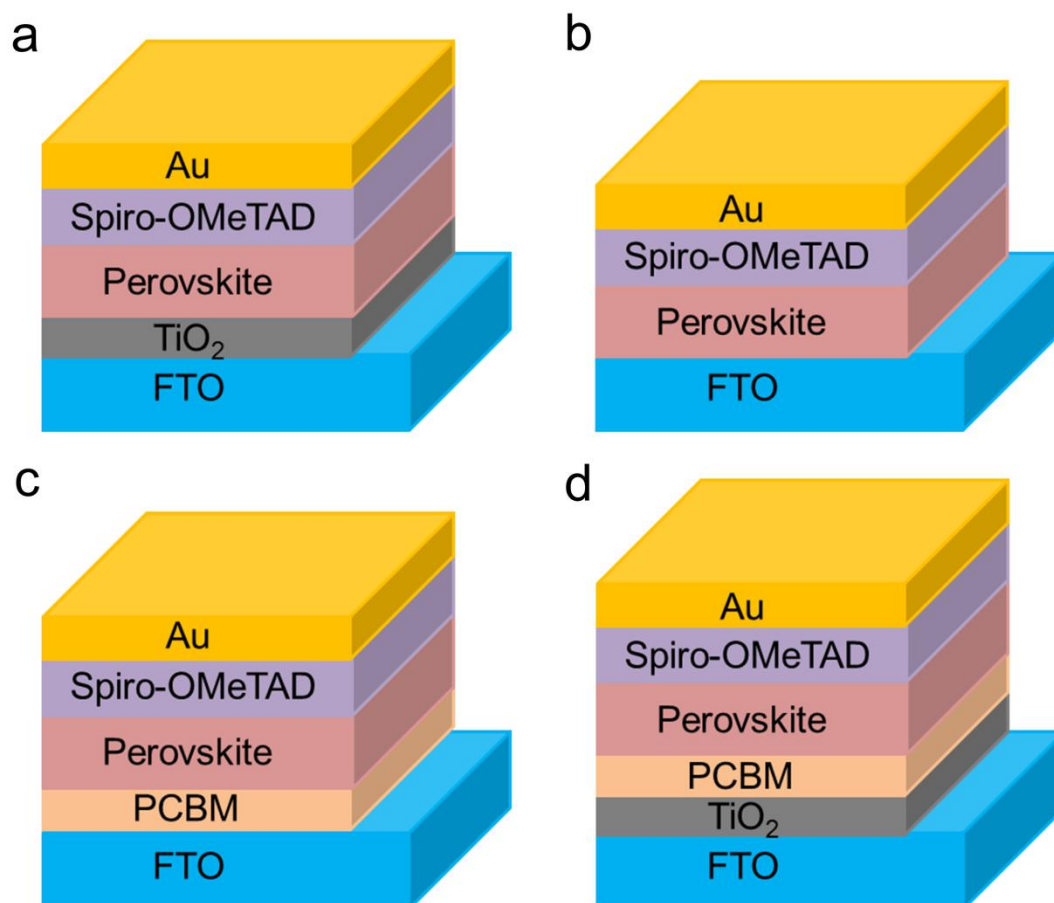

**Figure S1. Schematic of planar perovskite solar cells with different ETH schemes used in this work.** (a) TiO<sub>2</sub>-based, (b) ETH-free, (c) PCBM-based and (d) TiO<sub>2</sub>/PCBM-based schemes.

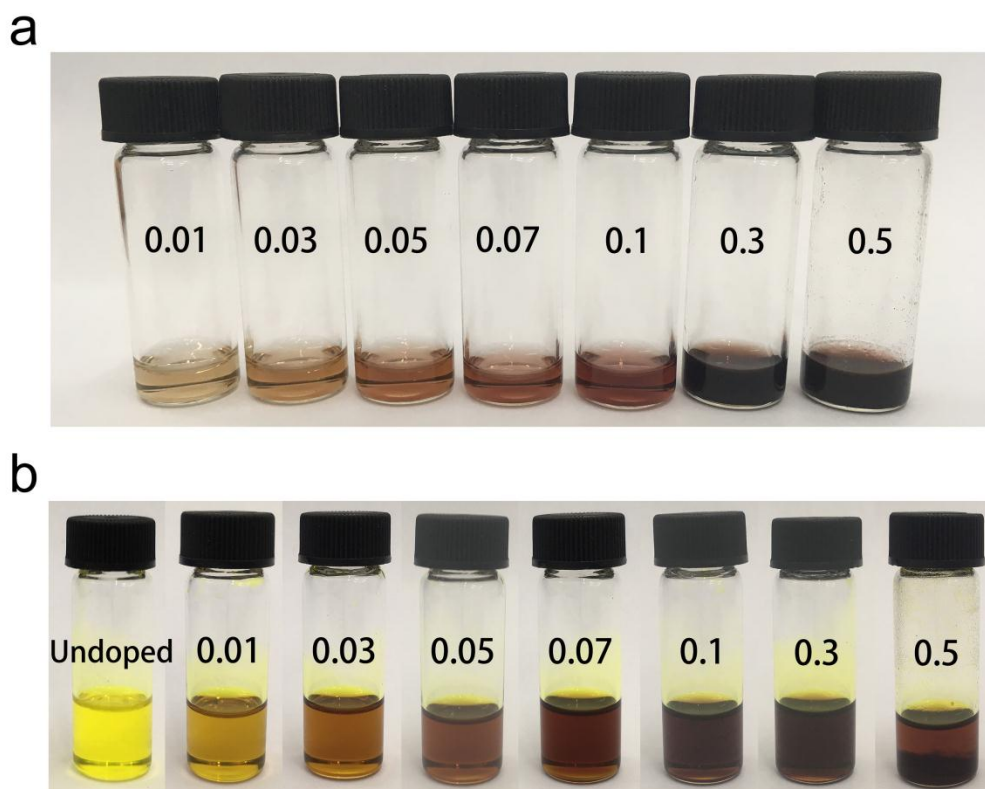

**Figure S2. Photographs of PCBM solutions and perovskite precursor solutions.**

(a) Study on PCBM Solubility in DMF/DMSO mixed solution. The undissolved PCBM powders are observed at 0.5 wt%. (b) Different PCBM doping concentrations of perovskite precursor solutions (0.14, 0.18, 0.22 and 0.26 wt% are not shown). One can clearly see that the obvious sediments exist in 0.5 wt% precursor solution.

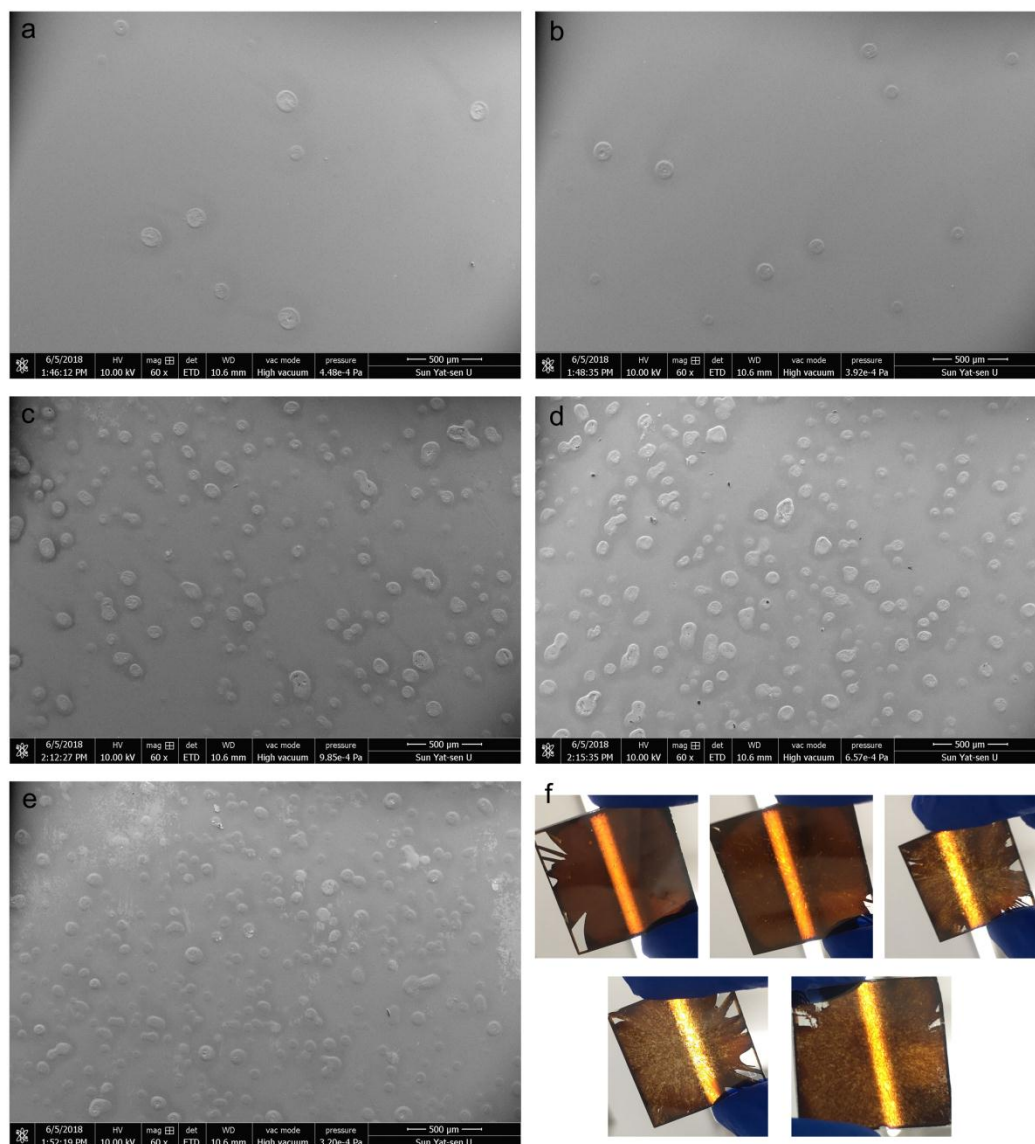

**Figure S3. SEM top-view and photographs for different PCBM doping concentrations of perovskite films on FTO substrate.** (a) 0.14 wt%, (b) 0.18 wt%, (c) 0.22 wt%, (d) 0.26 wt% and (e) 0.3 wt%. The scale bars is 500 μm. (f) Photographs of each PCBM-doped perovskite films. The above three are 0.14, 0.18 and 0.22 wt% samples from the left to right side, and the bottom two are 0.26 and 0.3 wt% samples from the left to right side.

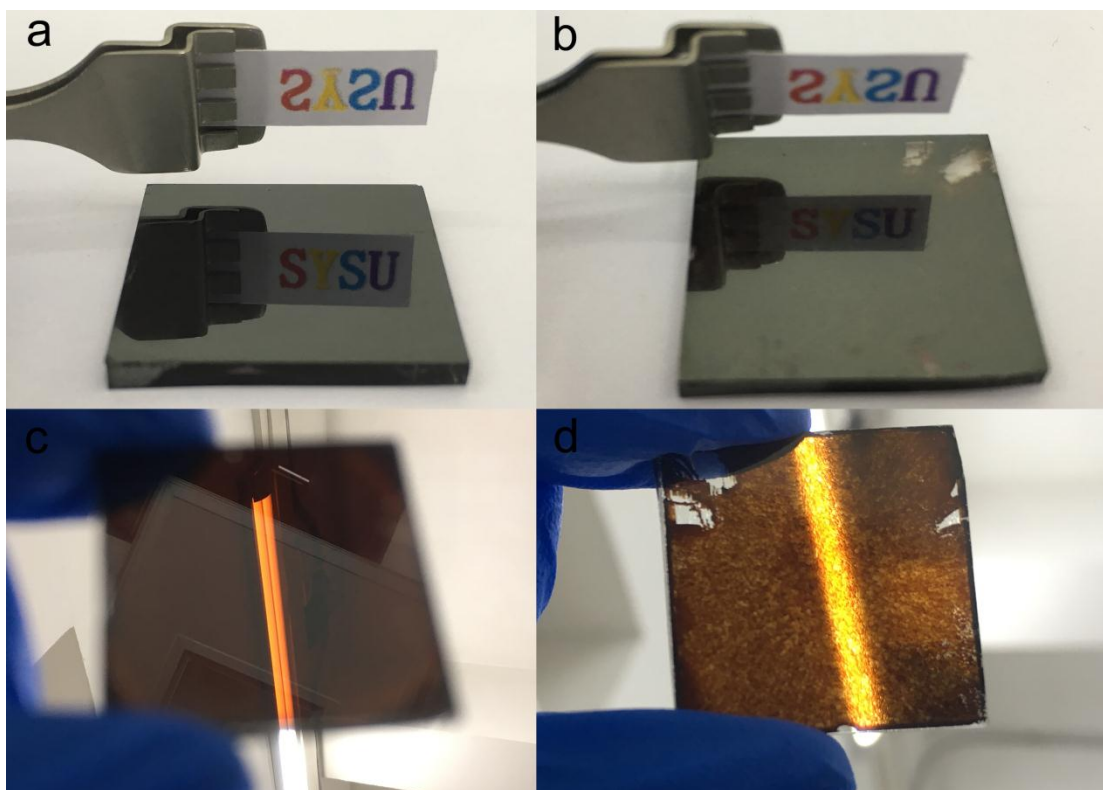

**Figure S4. Photographs of perovskite films on FTO.** (a,c) 0.1 wt% PCBM-doped perovskite sample. (b,d) 0.3 wt% PCBM-doped perovskite sample.

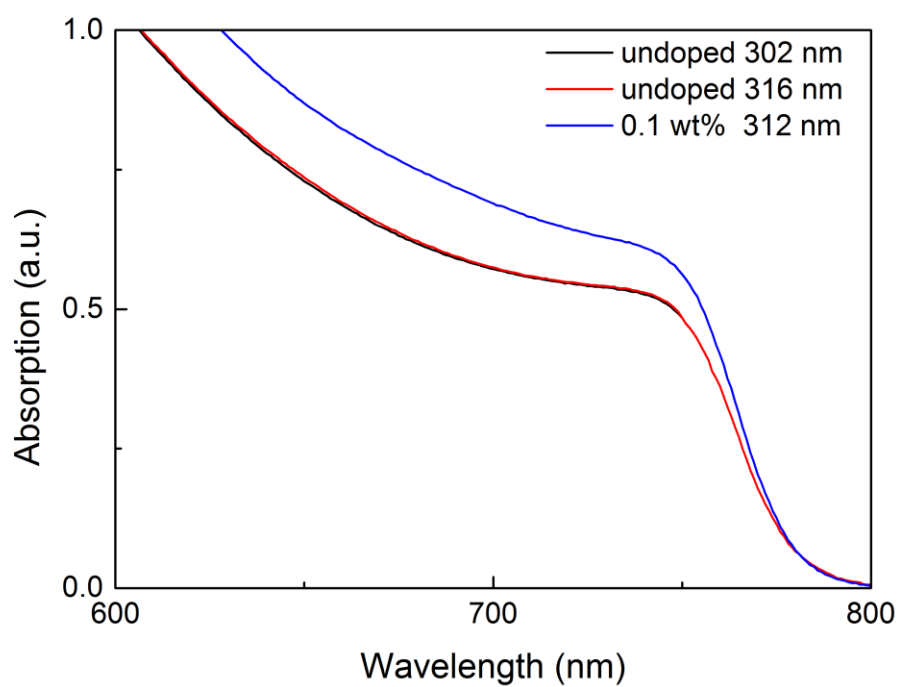

**Figure S5.** Absorption spectra of undoped perovskite film samples with different thickness and 0.1 wt% PCBM-doped perovskite film sample measured on FTO.

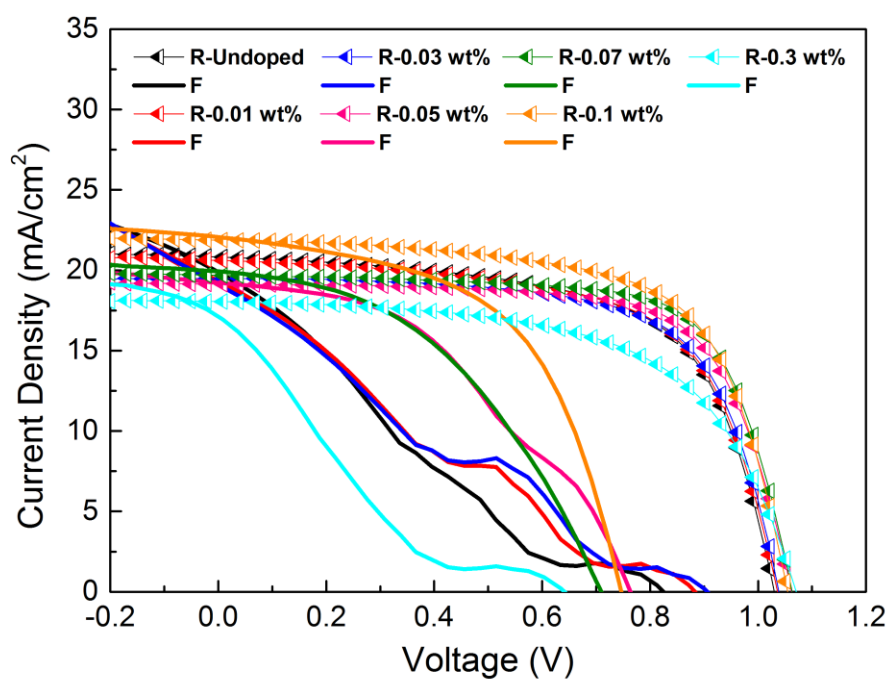

**Figure S6.** J-V characteristics of planar undoped and PCBM-doped perovskite solar cells without ETL measured under reverse (R) and forward (F) conditions. The slightly higher  $J_{sc}$  values (approximately  $\sim 1.5 \text{ mA/cm}^2$ ) in these devices can be attributed the measuring error, due to the uncorrected active area in the process of measurement.

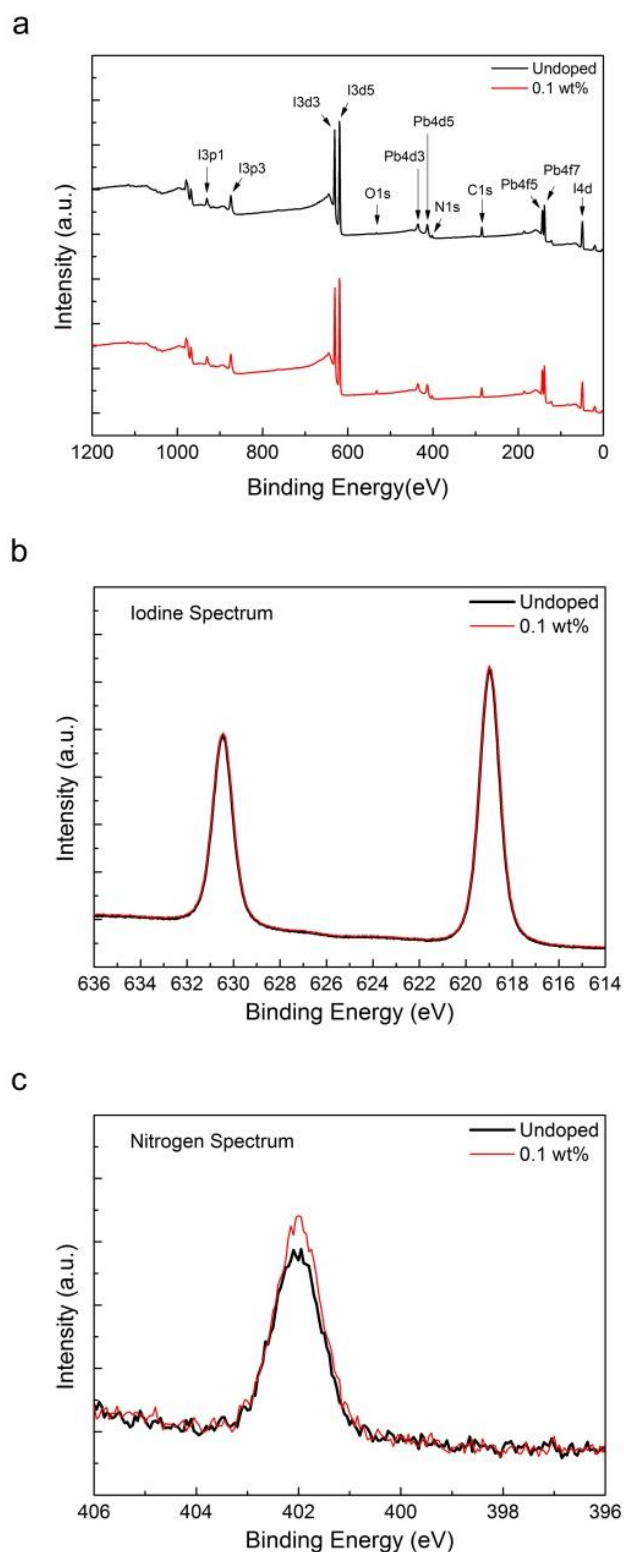

**Figure S7. XPS measurement on undoped and 0.1 wt% PCBM-doped perovskite films on FTO/PCBM substrate. (a) Overview spectra, (b) iodine core level spectra and (c) nitrogen core level spectra.**



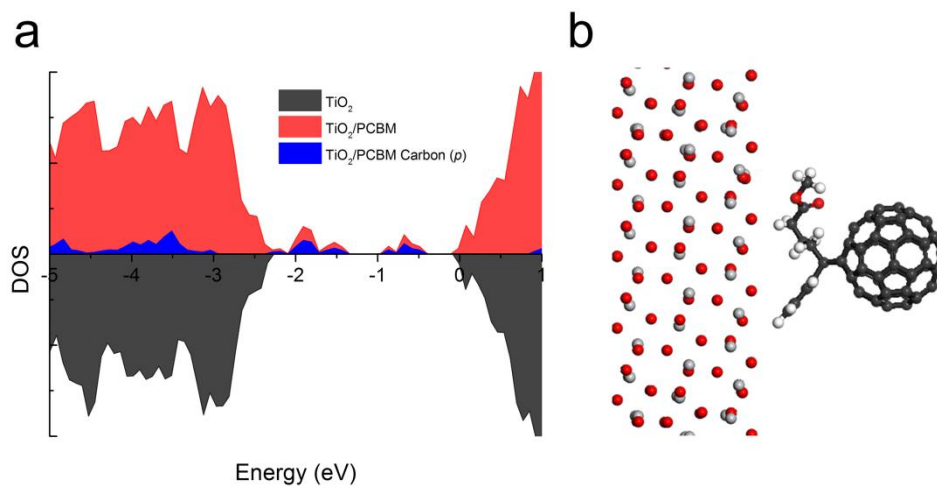

**Figure S8. DFT analysis of DOS on  $\text{TiO}_2(1\ 0\ 1)/\text{PCBM}$  adsorption structure.** (a) Total DOS of  $\text{TiO}_2(1\ 0\ 1)$  surface (black area) and  $\text{TiO}_2(1\ 0\ 1)/\text{PCBM}$  (red area) structures, and the partial DOS of Carbon  $p$  electrons (blue area) of  $\text{TiO}_2(1\ 0\ 1)/\text{PCBM}$  structure. (b) Schematic diagram of  $\text{TiO}_2(1\ 0\ 1)/\text{PCBM}$  adsorption structure.

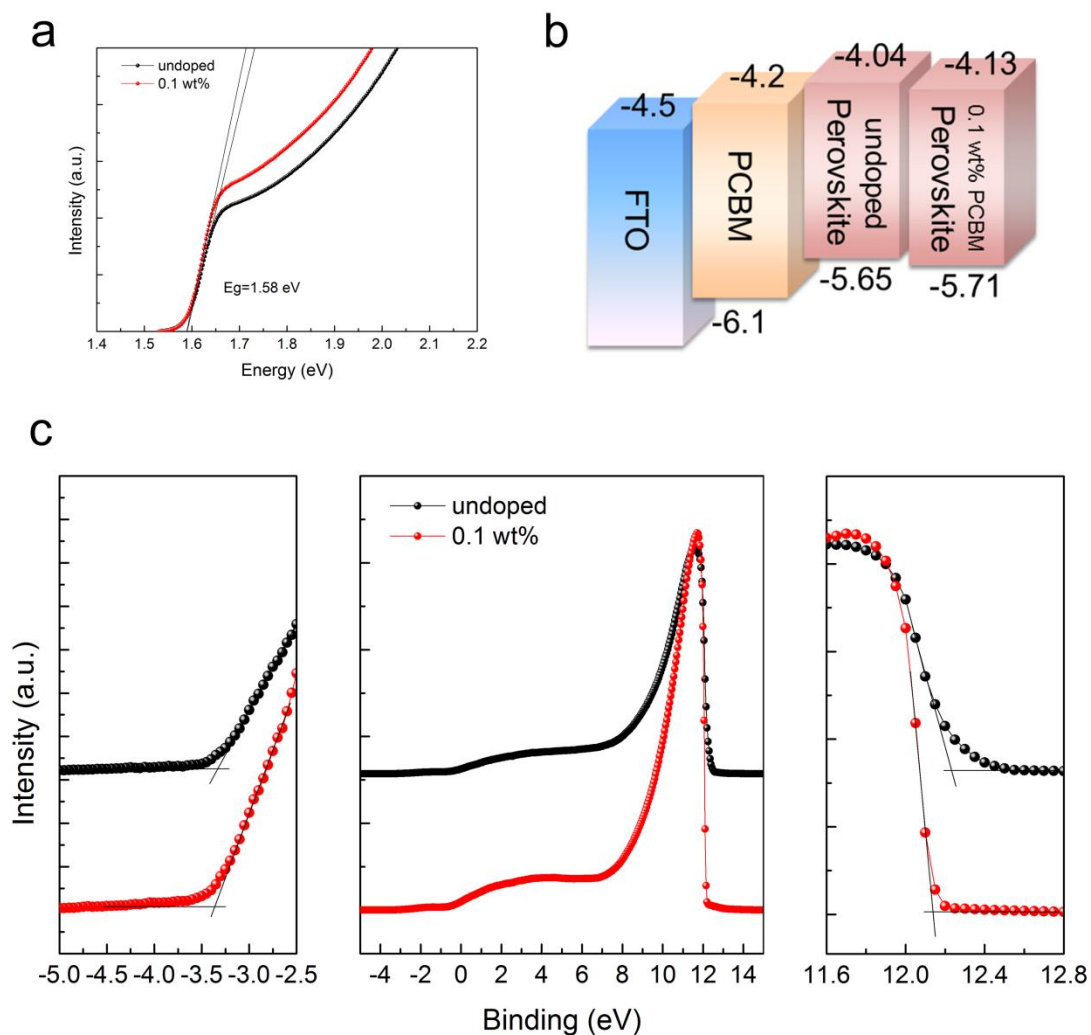

**Figure S9.** (a) Transformed spectra of undoped and 0.1 wt% PCBM-doped perovskites according to the absorption spectra. The band-gap ( $E_g$ ) was determined from  $h\alpha = \frac{A}{\alpha}(h\nu - E_g)^m$ , where  $h$  is Planck constant,  $\nu$  is photon frequency,  $A$  is a constant,  $m=0.5$  for perovskite materials and  $\alpha$  is absorption coefficient. (b) Schematic comparison diagram of energy level for undoped and 0.1 wt% PCBM-doped perovskites. (c) UPS spectra (with a -5 eV bias voltage) of undoped and 0.1 wt% PCBM-doped perovskite films measured on FTO/PCBM substrate, the magnifying figure of valence band edge (left), the overview spectra (middle) and the magnifying figure of onset edge (right).

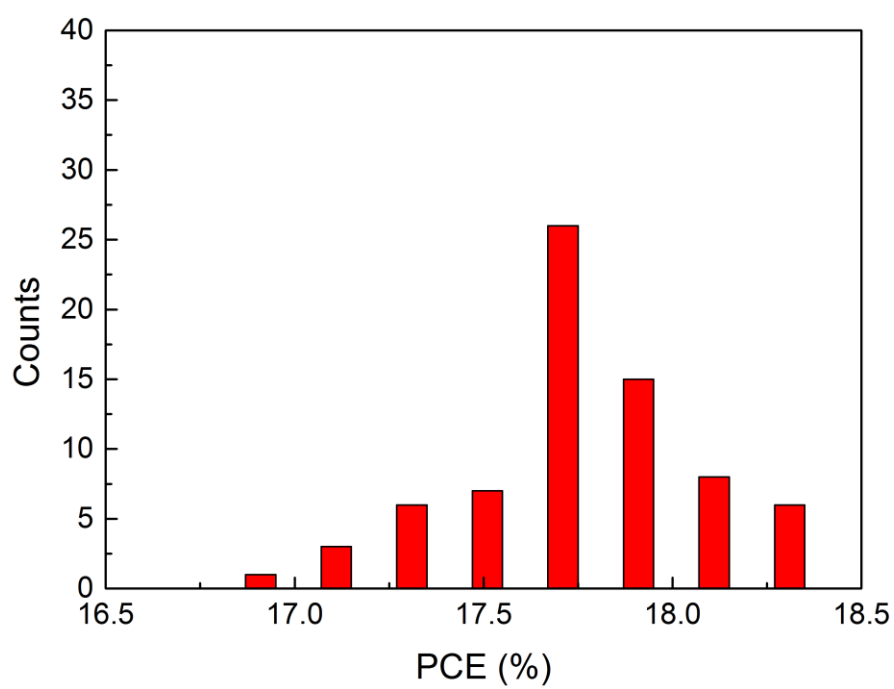

**Figure S10.** Histogram of the PCE values among 72 cells counted in FTO/TiO<sub>2</sub>/PCBM/0.1 wt% PCBM-perovskite/Spiro-OMeTAD/Au device.

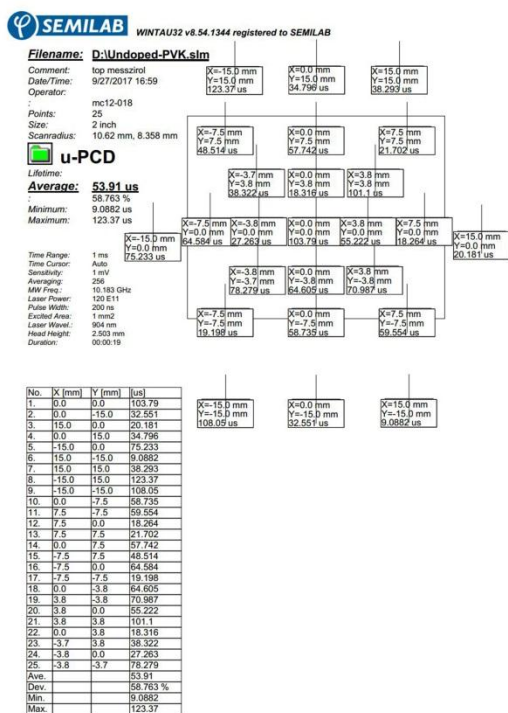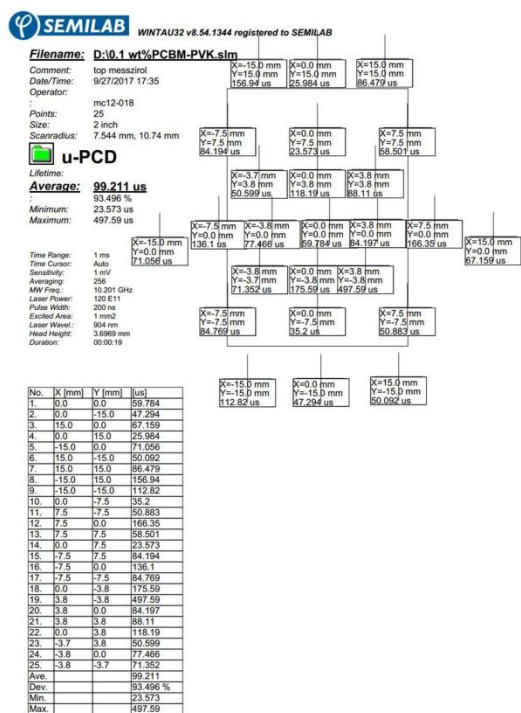

**Figure S11.** Testfile of minority carrier lifetimes for undoped (left) and 0.1 wt% PCBM-doped perovskites (right).

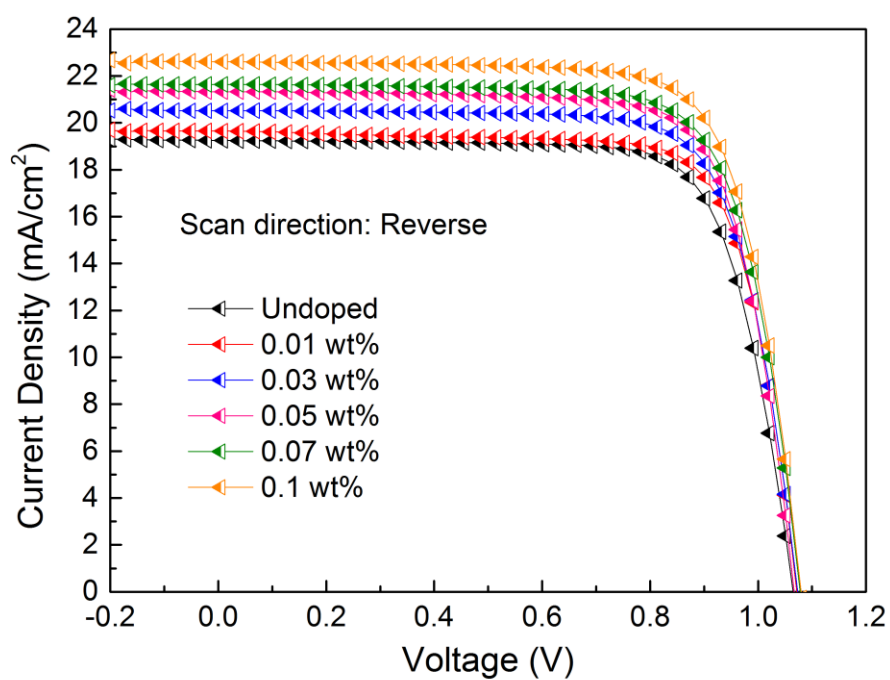

**Figure S12.** J-V characteristics of planar undoped and PCBM-doped perovskite solar cells with  $\text{TiO}_2/\text{PCBM}$ -based ETL measured under reverse condition.

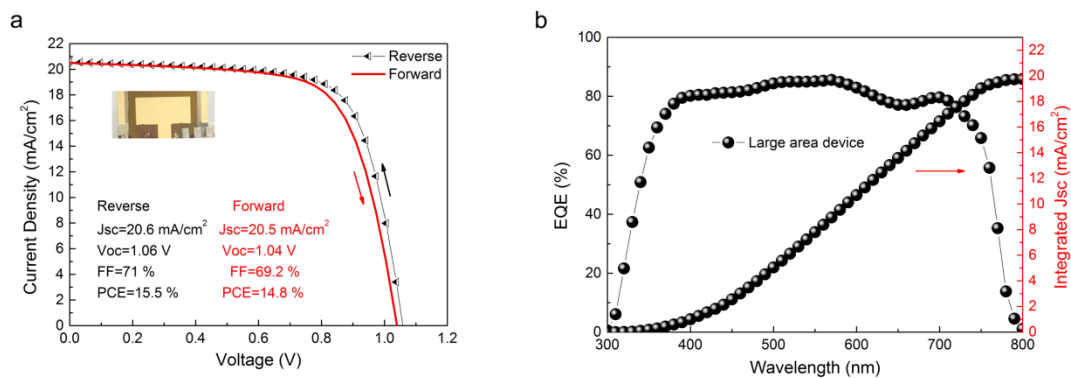

**Figure S13. The optimal performance of large area device in this work.** (a) J-V characteristics of large-area (1.05 cm<sup>2</sup>) TiO<sub>2</sub>/PCBM-based 0.1 wt% PCBM-doped perovskite solar cell. A quadrature mask with 0.84 cm<sup>2</sup> was used to correct the active area in the process of measurement. The inset is photograph of device. (b) External quantum efficiency (EQE) spectra and integrated J<sub>sc</sub> for the corresponding device.

**Table S1.** The thickness of perovskite films with different PCBM doping concentrations measured on FTO.

| <b>PCBM<br/>Concentrations<br/>(wt%)</b> | <b>Thickness<br/>(nm)</b> |     |     |     |     | <b>Average<br/>(nm)</b> |
|------------------------------------------|---------------------------|-----|-----|-----|-----|-------------------------|
| <b>0</b>                                 | 305                       | 300 | 303 | 299 | 301 | <b>302</b>              |
| <b>0.01</b>                              | 302                       | 307 | 307 | 300 | 306 | <b>304</b>              |
| <b>0.03</b>                              | 298                       | 300 | 298 | 301 | 300 | <b>299</b>              |
| <b>0.05</b>                              | 304                       | 305 | 305 | 303 | 306 | <b>305</b>              |
| <b>0.07</b>                              | 303                       | 301 | 305 | 303 | 308 | <b>304</b>              |
| <b>0.1</b>                               | 312                       | 314 | 310 | 314 | 311 | <b>312</b>              |

**Table S2.** Summary of TiO<sub>2</sub>/PCBM-based planar perovskite solar device parameters measured under reverse condition.

| <b>PCBM</b>                 | <b>Jsc (mA/cm<sup>2</sup>)</b> | <b>Voc</b> | <b>FF</b>  | <b>PCE</b> |
|-----------------------------|--------------------------------|------------|------------|------------|
| <b>Concentrations (wt%)</b> |                                | <b>(V)</b> | <b>(%)</b> | <b>(%)</b> |
| <b>0</b>                    | 19.3                           | 1.07       | 75.3       | 15.6       |
| <b>0.01</b>                 | 19.6                           | 1.07       | 75.8       | 15.9       |
| <b>0.03</b>                 | 20.5                           | 1.07       | 75.4       | 16.5       |
| <b>0.05</b>                 | 21.3                           | 1.07       | 75.4       | 17.2       |
| <b>0.07</b>                 | 21.6                           | 1.08       | 74.9       | 17.5       |
| <b>0.1</b>                  | 22.6                           | 1.08       | 75.1       | 18.3       |



## Calculation Description

First-principle calculation within density functional theory (DFT) was used to investigate all structures by employing the Vienna Ab initio Simulation Package (VASP) in this work.<sup>1</sup> The structural optimization process was performed by using generalized gradient approximation (GGA)<sup>2</sup> with projector augmented wave (PAW)<sup>3</sup> pseudopotentials. The plane wave energy cutoff of 310 eV was used for all modeling surface and adsorption structures. The converged  $1 \times 1 \times 1$  and  $2 \times 2 \times 2$  Monkhorst–Pack<sup>4</sup> grid for k-point samplings were used for structural relaxation and density of state (DOS), respectively. All structures were configured 80 Å thickness of vacuum layer along c-axis. The structure of PCBM molecule adsorbed on TiO<sub>2</sub> surface was modeled by using anatase TiO<sub>2</sub> (1 0 1) surface, which is the mainly exposed surface in nature and applied surface in the field of solar cell devices.<sup>5, 6</sup> For the perovskite/PCBM adsorption structure, the PbI<sub>2</sub>-terminated CH<sub>3</sub>NH<sub>3</sub>PbI<sub>3</sub> (0 0 1) surface, which the relatively stable surface possessing a small surface energy<sup>7</sup> with the Pb-I antisite defects (the most anticipated defect<sup>8</sup>) was used, meanwhile, establishing one or twain adsorbed PCBM molecules on surface to represent the change of doping concentrations. For the adsorption orientation of one PCBM molecule, O-facing scheme was used in this work that referred the previous report.<sup>9</sup> Van der Walls interactions were included Semi-empirically by using the dispersion-corrected density functional theory (DFT-D).<sup>10</sup> All atoms were relaxed until the Hellmann–Feynman force on each atom was less than 10 meV/Å.

## References

- (1) Kresse, G.; Furthmüller, J. Efficient Iterative Schemes for Ab Initio Total-energy Calculations Using A Plane-wave Basis Set. *Phys. Rev. B* **1996**, *54* (16), 11169-11186.
- (2) Perdew, J. P.; Chevary, J. A.; Vosko, S. H.; Jackson, K. A.; Pederson, M. R.; Singh, D. J.; Fiolhais, C. Atoms, Molecules, Solids, and Surfaces: Applications of The Generalized Gradient Approximation for Exchange and Correlation. *Phys. Rev. B* **1992**, *46* (11), 6671-6687.
- (3) Blochl, P. E. Projector Augmented-wave Method. *Phys. Rev. B* **1994**, *50* (24), 17953-17979.
- (4) Monkhorst, H. J. Special Points for Brillouin-zone Integrations. *Phys. Rev. B* **1976**, *16* (4), 1748-1749.
- (5) Grätzel, M. Dye-sensitized Solar Cells. *J. Photoch. Photobio. C* **2003**, *4* (2), 145-153.
- (6) Lazzeri, M.; Vittadini, A.; Selloni, A. Structure and Energetics of Stoichiometric TiO<sub>2</sub> Anatase Surfaces. *Phys. Rev. B* **2001**, *65* (11), 155409.
- (7) Haruyama, J.; Sodeyama, K.; Han, L.; Tateyama, Y. Termination Dependence of Tetragonal CH<sub>3</sub>NH<sub>3</sub>PbI<sub>3</sub> Surfaces for Perovskite Solar Cells. *J. Phys. Chem. Lett.* **2014**, *5* (16), 2903-2909.
- (8) Buin, A.; Pietsch, P.; Xu, J.; Voznyy, O.; Ip, A. H.; Comin, R.; Sargent, E. H. Materials Processing Routes to Trap-free Halide Perovskites. *Nano. Lett.* **2014**, *14* (11), 6281-6286.

- (9) Xu, J.; Buin, A.; Ip, A. H.; Li, W.; Voznyy, O.; Comin, R.; Yuan, M.; Jeon, S.; Ning, Z.; McDowell, J. J.; Kanjanaboos, P.; Sun, J. P.; Lan, X.; Quan, L. N.; Kim, D. H.; Hill, I. G.; Maksymovych, P.; Sargent, E. H. Perovskite-fullerene Hybrid Materials Suppress Hysteresis in Planar Diodes. *Nat. Commun.* **2015**, *6*, 7081.
- (10) Barone, V.; Casarin, M.; Forrer, D.; Pavone, M.; Sami, M.; Vittadini, A. Role and Effective Treatment of Dispersive Forces in Materials: Polyethylene and Graphite Crystals as Test Cases. *J. Comput. Chem.* **2009**, *30* (6), 934-939.
